# Supplementary material
Source: Springer Nature journal article supplement (https://www.springermedizin.de/resource/supplementary/12933_2013_729_MOESM6_ESM.pdf/9538850)

5.6mM D-glucose  
(Control)

25mM D-glucose

HUVEC

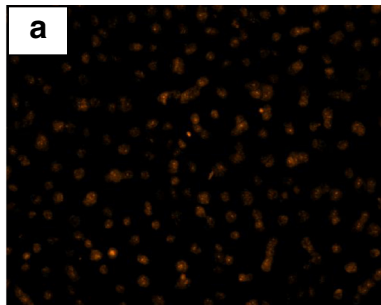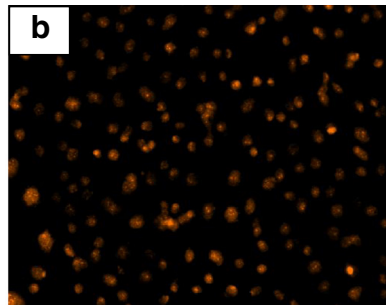

HMVEC

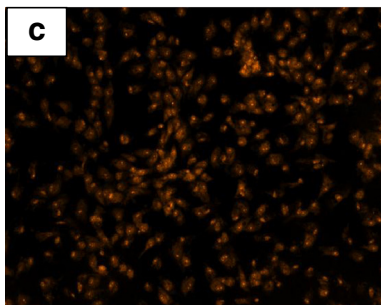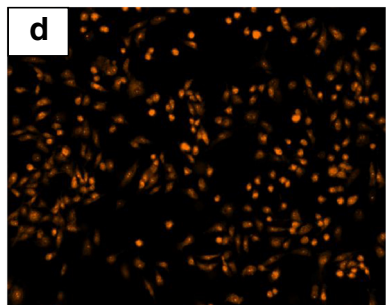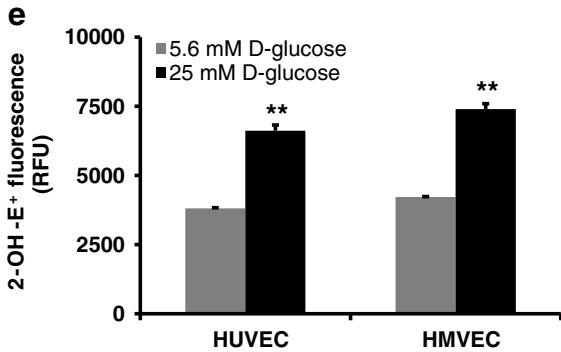

Supplement: MOESM6 [file 9538850]
